# Supplementary material
Source: PubMed Central journal article supplement (PMC10916989)
Supplement: ALZ-20-525-s002.pdf [file ALZ-20-525-s002.pdf]

## Supplementary material

### Associations of cortical *SPP1* and *ITGAX* with cognition and common neuropathologies in older adults

Katia de Paiva Lopes<sup>1,2</sup>, Lei Yu<sup>1,2</sup>, Xianli Shen<sup>3,4</sup>, Yiguo Qiu<sup>3,4</sup>, Shinya Tasaki<sup>1,2</sup>, Artemis Iatrou<sup>1,2,5</sup>, Michal Schnaider Beeri<sup>6,7</sup>, Nicholas T. Seyfried<sup>8</sup>, Vilas Menon<sup>9</sup>, Yanling Wang<sup>1,2</sup>, Julie A. Schneider<sup>1,2,10</sup>, Harvey Cantor<sup>3,4</sup>, David A. Bennett<sup>1,2</sup>

<sup>1</sup> Rush Alzheimer's Disease Center, Rush University Medical Center; Chicago, IL, 60612, USA

<sup>2</sup> Department of Neurological Sciences, Rush University Medical Center; Chicago, IL, 60612, USA

<sup>3</sup> Department of Cancer Immunology and Virology, Dana-Farber Cancer Institute, Boston, MA, 02215, USA

<sup>4</sup> Department of Immunology, Harvard Medical School, Boston, MA, 02115, USA

<sup>5</sup> Department of Psychiatry, McLean Hospital, Harvard Medical School, Belmont, MA, 02114, USA

<sup>6</sup> Joseph Sagol Neuroscience Center, Sheba Medical Center, Ramat Gan, 52621, Israel

<sup>7</sup> Department of Psychiatry, Icahn School of Medicine at Mount Sinai, New York, NY, 10029, USA

<sup>8</sup> Goizueta Alzheimer's Disease Research Center, Department of Neurology and Department of Biochemistry, Emory University School of Medicine, Atlanta, GA, 30322, USA

<sup>9</sup> Center for Translational and Computational Neuroimmunology, Department of Neurology & Taub Institute for Research on Alzheimer's disease and the Aging Brain, Columbia University Irving Medical Center; New York, NY, 10032, USA

<sup>10</sup> Department of Pathology, Rush University Medical Center; Chicago, IL, 60612, USA.

Corresponding author: Katia de Paiva Lopes, PhD

Email: [katia\\_d\\_lopes@rush.edu](mailto:katia_d_lopes@rush.edu)

Rush Alzheimer's Disease Center

1750 W Harrison Street, Suite 1000

Chicago, IL 60612

## List of figures and tables

Supplementary Figure 1 – The correlations of *SPP1* and *ITGAX* expression from bulk RNASeq.

Supplementary Figure 2 - *ITGAX* and *SPP1* expression in the snRNASeq data.

Supplementary Figure 3 - *SPP1* and *ITGAX* expression in the microglial subpopulation.

Supplementary Table 01 – The associations of *SPP1* and OPN with clinical diagnosis at death.

Supplementary Table 02 – Association analysis with the MSBB RNASeq dataset.

Supplementary Table 03 – Association analysis with the Mayo Clinic RNASeq dataset.

Supplementary Table 04 – Association analysis with TMT proteins from MSBB.

Supplementary Table 05 – Annotation of the microglial subpopulations.

| <b>Pearson Correlation Coefficients</b><br><b>Prob &gt;  r  under H0: Rho=0</b><br><b>Number of Observations</b> |                           |                           |                          |                          |
|------------------------------------------------------------------------------------------------------------------|---------------------------|---------------------------|--------------------------|--------------------------|
|                                                                                                                  | <b>SPP1_MF</b>            | <b>ITGAX_MF</b>           | <b>P10451</b>            | <b>P20702</b>            |
| <b>SPP1_MF</b>                                                                                                   | 1.00000<br>1216           | 0.25473<br><.0001<br>1216 | 0.48657<br><.0001<br>541 | 0.07852<br>0.0887<br>471 |
| <b>ITGAX_MF</b>                                                                                                  | 0.25473<br><.0001<br>1216 | 1.00000<br>1216           | 0.08557<br>0.0467<br>541 | 0.16631<br>0.0003<br>471 |
| <b>P10451</b>                                                                                                    | 0.48657<br><.0001<br>541  | 0.08557<br>0.0467<br>541  | 1.00000<br>580           | 0.26142<br><.0001<br>489 |
| <b>P20702</b>                                                                                                    | 0.07852<br>0.0887<br>471  | 0.16631<br>0.0003<br>471  | 0.26142<br><.0001<br>489 | 1.00000<br>505           |

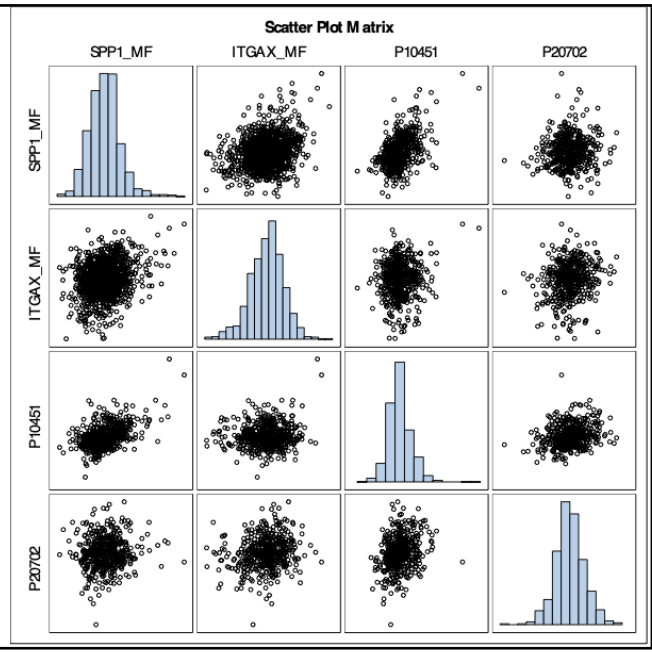

**Supplementary Figure 1 - Correlations of *SPP1* and *ITGAX* expression from bulk RNASeq.** The results are for RNA and protein levels. P10451 = OPN, P20702 = CD11c.

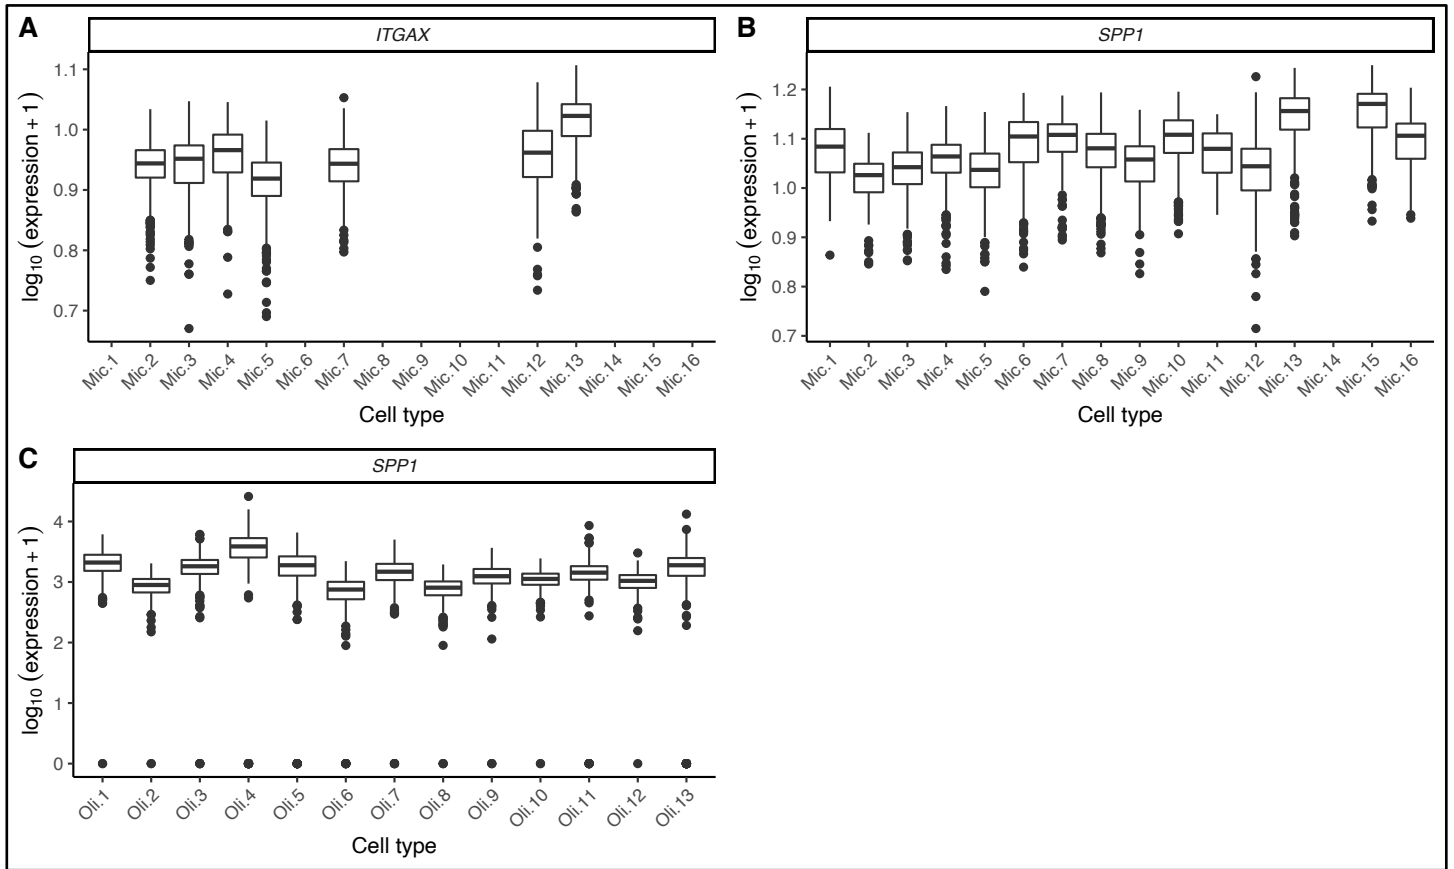

**Supplementary Figure 2 - *ITGAX* and *SPP1* expression in the snRNASeq data.** A) *ITGAX* expression in the microglial subpopulation. B) *SPP1* expression in the microglial subpopulation. C) *SPP1* expression in the oligodendrocytes clusters. Cells nomenclature: Mic = microglia and Oli = oligodendrocytes.

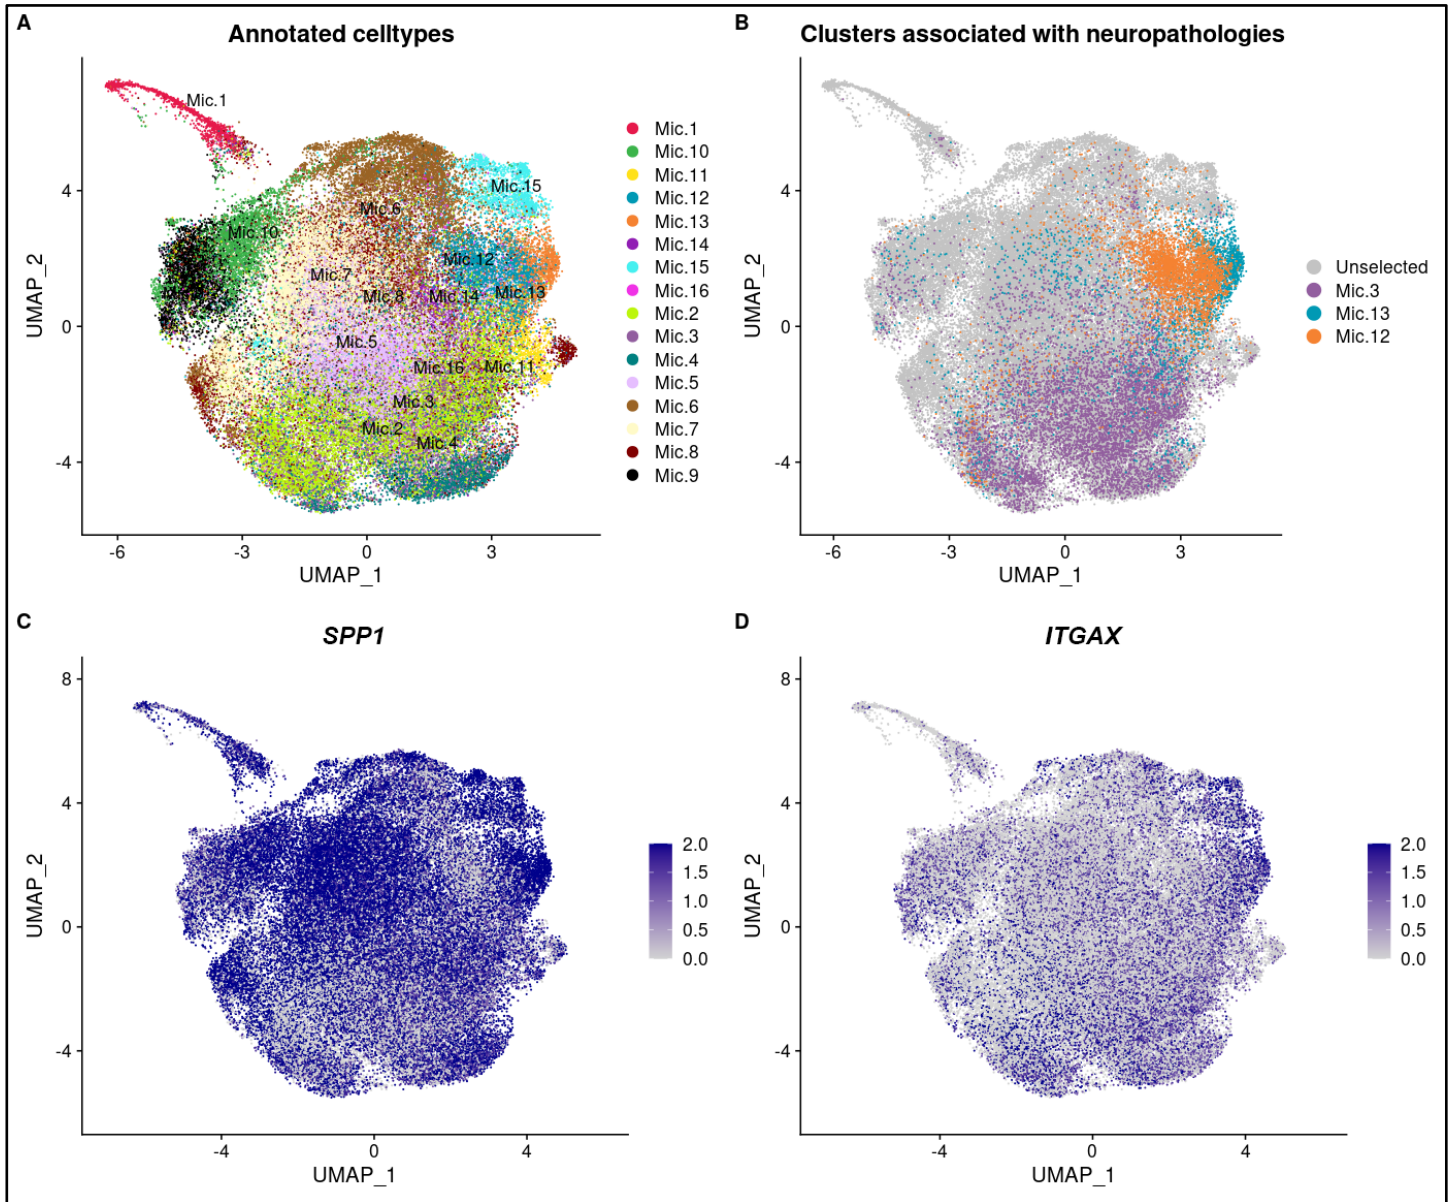

**Supplementary Figure 3 - *SPP1* and *ITGAX* expression in the microglial subpopulations.** A) Microglial sub-clusters visualized in an UMAP reduction. Annotations from Green et al, 2023 and Fujita et al, 2022<sup>1,2</sup>. B) Selected clusters associated with neuropathologic indices for better visualization. C) *SPP1* expression across the microglial sub-clusters. D) *ITGAX* surface protein expression across the microglial subpopulations. In these plots, each dot is a cell, so we can visualize the gene expression across the distinct cell clusters. Dark blue represents high expression, and gray no expression (C-D).

**Supplementary Table 01 – Associations of *SPP1* and OPN with clinical diagnosis at death.**

| <b>Variables</b>       | <b><i>SPP1</i> (N=1,205)</b> | <b>OPN (N=580)</b>     |
|------------------------|------------------------------|------------------------|
| Age at death,          | 1.0672 (1.0489,1.0857)       | 1.0932 (1.0653,1.1218) |
| Male sex               | 1.0330 (0.8160,1.3075)       | 1.0536 (0.7500,1.4801) |
| Educational            | 1.0087 (0.9781,1.0404)       | 1.0219 (0.9752,1.0708) |
| <i>SPP1</i> expression | 1.3629 (1.2072,1.5387)       |                        |
| OPN expression         |                              | 1.3012 (1.1101,1.5252) |

The results for *SPP1*, and separately OPN, were obtained from a logistic regression model with a 3-level ordinal outcome of no cognitive impairment (reference), mild cognitive impairment and dementia. The statistics in each cell are odds ratio (95% confidence interval).

**Supplementary Table 02 – The associations with the MSBB RNASeq dataset.** CERAD = Test from the Consortium to Establish a Registry for Alzheimer's Disease, Braak refers to the AD score for progression of neurofibrillary pathology, CDR = Clinical dementia rating scale, plaqueMean = density of neuritic plaques <sup>3</sup>.

| <b>pheno</b> | <b>Estimate</b> | <b>Std. Error</b> | <b>df</b>   | <b>t value</b> | <b>Pr(&gt; t )</b> | <b>gene</b>  |
|--------------|-----------------|-------------------|-------------|----------------|--------------------|--------------|
| CERAD        | 0.037653501     | 0.0614423         | 299.7822056 | 0.612826969    | 0.540455366        | <i>SPP1</i>  |
| Braak        | 0.099004344     | 0.03015903        | 302.9530329 | 3.282742649    | 0.001148289        | <i>SPP1</i>  |
| CDR          | 0.125009888     | 0.03435023        | 306.0363784 | 3.639273326    | 0.000320839        | <i>SPP1</i>  |
| plaqueMean   | 0.017723861     | 0.00818247        | 213.7553285 | 2.166076854    | 0.031411825        | <i>SPP1</i>  |
| CERAD        | -0.035957882    | 0.03909985        | 297.5154299 | -0.919642513   | 0.35850462         | <i>ITGAX</i> |
| Braak        | 0.125168845     | 0.01824624        | 304.0141866 | 6.859981894    | 3.86093E-11        | <i>ITGAX</i> |
| CDR          | 0.123132451     | 0.02131791        | 308.0457942 | 5.776008856    | 1.86966E-08        | <i>ITGAX</i> |
| plaqueMean   | 0.023543896     | 0.00493446        | 208.5736712 | 4.7713196      | 3.43755E-06        | <i>ITGAX</i> |

**Supplementary Table 03 – The associations with the Mayo Clinic RNASeq dataset.** Braak refers to the AD score for progression of neurofibrillary pathology, PSP = progressive supranuclear palsy <sup>4</sup>.

| <b>pheno</b>                 | <b>Estimate</b> | <b>Std. Error</b> | <b>df</b> | <b>t value</b> | <b>Pr(&gt; t )</b> | <b>gene</b>  |
|------------------------------|-----------------|-------------------|-----------|----------------|--------------------|--------------|
| AD diagnosis                 | 0.307570139     | 0.185600408       | 499       | 1.657163056    | 0.098115056        | <i>SPP1</i>  |
| Pathological aging diagnosis | 0.190206151     | 0.256856691       | 499       | 0.740514682    | 0.459336043        | <i>SPP1</i>  |
| PSP diagnosis                | -0.236916037    | 0.2004781         | 499       | -1.181755198   | 0.237865712        | <i>SPP1</i>  |
| Braak                        | 0.106960571     | 0.044332514       | 364       | 2.412689043    | 0.016328988        | <i>SPP1</i>  |
| Thal                         | 0.091376596     | 0.044360377       | 284       | 2.059869686    | 0.040322097        | <i>SPP1</i>  |
| AD diagnosis                 | -0.138084235    | 0.131774779       | 499       | -1.047880603   | 0.295200896        | <i>ITGAX</i> |
| Pathological aging diagnosis | 0.295747153     | 0.18236616        | 499       | 1.62172167     | 0.105494592        | <i>ITGAX</i> |
| PSP diagnosis                | -0.443004548    | 0.142337819       | 499       | -3.112346047   | 0.001962499        | <i>ITGAX</i> |
| Braak                        | 0.061267428     | 0.030956667       | 364       | 1.979135143    | 0.048553966        | <i>ITGAX</i> |
| Thal                         | 0.075218418     | 0.030707532       | 284       | 2.449510383    | 0.014909154        | <i>ITGAX</i> |



**Supplementary Table 04 – The associations with the TMT proteins from MSBB.** CERAD = Test from the Consortium to Establish a Registry for Alzheimer's Disease, Braak refers to the AD score for progression of neurofibrillary pathology, CDR = Clinical dementia rating scale, plaqueMean = density of neuritic plaques <sup>5</sup>

| <b>pheno</b> | <b>Estimate</b> | <b>Std. Error</b> | <b>t value</b> | <b>Pr(&gt; t )</b> | <b>protein</b> |
|--------------|-----------------|-------------------|----------------|--------------------|----------------|
| CERAD        | 0.009657771     | 0.024736194       | 0.390430767    | 0.696682279        | ITGAX_P20702   |
| Braak        | 0.084896821     | 0.011311835       | 7.505132235    | 2.77835E-12        | ITGAX_P20702   |
| CDR          | 0.082060625     | 0.013610941       | 6.029019336    | 9.20806E-09        | ITGAX_P20702   |
| plaqueMean   | 0.0217182       | 0.003276788       | 6.627893605    | 7.76197E-10        | ITGAX_P20702   |
| CERAD        | 0.050384217     | 0.035962956       | 1.401003238    | 0.16294438         | SPP1_P10451    |
| Braak        | 0.058424912     | 0.01844173        | 3.168081899    | 0.001804642        | SPP1_P10451    |
| CDR          | 0.046929212     | 0.021530326       | 2.179679607    | 0.030586966        | SPP1_P10451    |
| plaqueMean   | 0.012752548     | 0.005189532       | 2.457360098    | 0.015283687        | SPP1_P10451    |

**Supplementary Table 05 - Annotation of the microglial subpopulations.** Annotation from Fujita et al, 2022 and Gilad Green et al, 2023. In bold, the clusters associated with neuropathologic indices, in our study.

| <b>State</b>  | <b>Description</b>                        |
|---------------|-------------------------------------------|
| Mic.1         | Proliferating                             |
| Mic.2         | Homeostatic                               |
| <b>Mic.3</b>  | <b>Homeostatic/ tau-associated</b>        |
| Mic.4         | Homeostatic                               |
| Mic.5         | Homeostatic                               |
| Mic.6         | Reactive                                  |
| Mic.7         | Reactive                                  |
| Mic.8         | Reactive                                  |
| Mic.9         | Homeostatic-Redox                         |
| Mic.10        | Reactive-Redox                            |
| Mic.11        | Stress-Response                           |
| <b>Mic.12</b> | <b>Disease-Elevated/ lipid-associated</b> |
| <b>Mic.13</b> | <b>Disease-Elevated/ lipid-associated</b> |
| Mic.14        | Interferon-Response                       |
| Mic.15        | Mic.15                                    |
| Mic.16        | Mic.16                                    |

## REFERENCES

1. Fujita M, Gao Z, Zeng L, et al. Cell-subtype specific effects of genetic variation in the aging and Alzheimer cortex. *bioRxivorg*. Published online November 8, 2022. doi:10.1101/2022.11.07.515446
2. Green GS, Fujita M, Yang HS, et al. Cellular dynamics across aged human brains uncover a multicellular cascade leading to Alzheimer's disease. *bioRxivorg*. Published online March 9, 2023. doi:10.1101/2023.03.07.531493
3. Wang M, Beckmann ND, Roussos P, et al. The Mount Sinai cohort of large-scale genomic, transcriptomic and proteomic data in Alzheimer's disease. *Sci Data*. 2018;5(1):180185.
4. Allen M, Carrasquillo MM, Funk C, et al. Human whole genome genotype and transcriptome data for Alzheimer's and other neurodegenerative diseases. *Sci Data*. 2016;3:160089.
5. Bai B, Wang X, Li Y, et al. Deep multilayer brain proteomics identifies molecular networks in Alzheimer's disease progression. *Neuron*. 2020;106(4):700.
